# Supplementary material for: Synthesis and magnetic properties of manganese carbonyl complexes with different coordination modes of 3,4,5-triaryl-1,2-diphospholide ligands
Source: Royal Society of Chemistry journal article supplement (doi:10.1039/c5dt00624d), 2015-01-01
Supplement: c5dt00624d1.pdf [file c5dt00624d1.pdf]

## Supporting information

Synthesis and magnetic properties of manganese carbonyl complexes with  
different coordination modes of 3,4,5-triaryl-1,2-diphospholide ligand

*Vasili A. Miluykov<sup>a</sup>, Ilya A. Bezkishko<sup>a</sup>, Liliya R. Kochetkova, Olga N. Kataeva<sup>a</sup>, Tatiana P. Gerasimova<sup>a</sup>, Sergey A. Katsyuba<sup>a</sup>, Oleg G. Sinyashin<sup>a</sup>, Peter Lönnecke<sup>b</sup>, Evamarie Hey-Hawkins<sup>b</sup>, Anupama Parameswaran<sup>c</sup>, Yulia Krupskaya<sup>c</sup>, Vladislav Kataev<sup>c</sup>, Bernd Büchner<sup>c,d</sup>*

<sup>a</sup>*A.E. Arbuzov Institute of Organic and Physical Chemistry, Kazan Scientific Center, Russian Academy of Sciences, Arbuzov Str. 8, Kazan 420088, Russian Federation, e-mail: [miluykov@iopc.ru](mailto:miluykov@iopc.ru)*

<sup>b</sup>*Leipzig University, Institute of Inorganic Chemistry, Johannisallee 29, D-04103 Leipzig, Germany*

<sup>c</sup>*Leibniz Institute for Solid State and Materials Research IFW Dresden, POB 270116, D-01171, Dresden, Germany*

<sup>d</sup>*Institut für Festkörperphysik, Technische Universität Dresden, D-01062 Dresden, Germany*

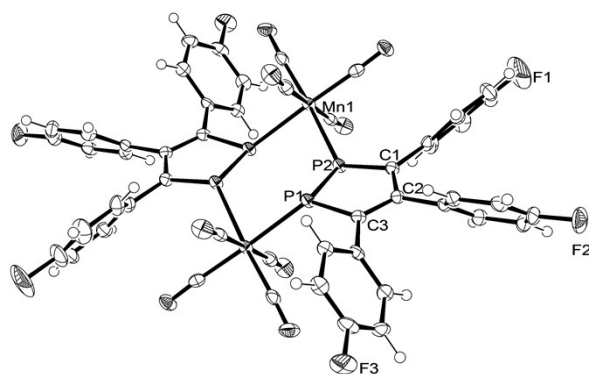

**Figure 1S.** ORTEP drawing of bis-( $\mu,\eta^1:\eta^1$ -3,4,5-tris-(*para*-fluorophenyl)-1,2-diphosphacyclopentadienide)-bis-(tetracarbonylmanganese(I)) (**2b**). Selected bond lengths (Å) and angles (°): Mn1-P1 2.3661(8); Mn1-P2 2.3675(8); P1-P2 2.112(1); P1-C3 1.750(3); P2-C1 1.750(3); C1-C2 1.416(3); C2-C3 1.396(4); C3-P1-P2 94.6(1); P2-P1-Mn1 123.11(3); C3-P1-Mn1 125.72(9); C1-P2-P1 94.59(9); P1-P2-Mn1 122.42(4); C1-P2-Mn1 125.51(9).

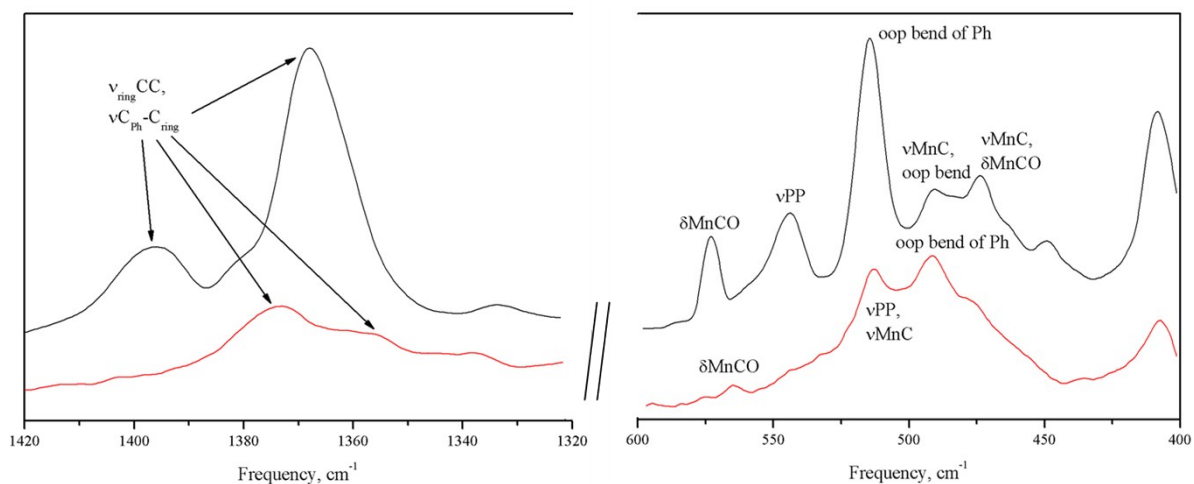

**Figure 2S.** Comparison of experimental Raman spectra of **2a** (black) and **3a** (red). The bands are assigned on the basis of DFT spectra simulations:  $\nu$  (stretching),  $\delta$  (bending), oop bend (out-of-plane bending) vibrations.

**Table 1S:** Scaling factors for the force fields of compounds **2a** and **3a**.

| scaling factor |                | value               |
|----------------|----------------|---------------------|
| stretch        | CC, CO         | 0.9207 <sup>a</sup> |
| stretch        | CH             | 0.915 <sup>b</sup>  |
| stretch        | CP, PP         | 1.040 <sup>c</sup>  |
| stretch        | CMn, MnP       | 1.0                 |
| bend           | CCC, PCC       | 1.0144 <sup>a</sup> |
| bend           | PPC            | 1.070 <sup>c</sup>  |
| bend           | CCH            | 0.950 <sup>a</sup>  |
| torsion        | all            | 0.9523 <sup>a</sup> |
| out of plane   | ring-H, ring-C | 0.976 <sup>a</sup>  |

<sup>a</sup> Baker, J.; Jarzecki, A.; Pulay, P. *J. Phys. Chem. A* **1998**, *102*, 1412-1424.

<sup>b</sup> Katsyuba, S. A.; Grunenberg, J.; Schmutzler, R. *J. Mol. Struct.* **2001**, *559*, 315-320.

<sup>c</sup> Katsyuba, S. A.; Vandyukova, E. E. *Chem. Phys. Lett.* **2003**, *377*, 658-662

**Table 2S:** Calculated and experimental vibrational spectra of **2a**.

| Experiment                                |                                           | Computations                                                                                                                                                        |                                                                                                         |                                                                                      |
|-------------------------------------------|-------------------------------------------|---------------------------------------------------------------------------------------------------------------------------------------------------------------------|---------------------------------------------------------------------------------------------------------|--------------------------------------------------------------------------------------|
| IR, solid                                 | Raman, solid                              | $\nu$ (cm <sup>-1</sup> ) <sup>b</sup>                                                                                                                              | I <sub>IR</sub>                                                                                         | Assignment <sup>c</sup>                                                              |
| $\nu$ (cm <sup>-1</sup> ), I <sup>a</sup> | $\nu$ (cm <sup>-1</sup> ), I <sup>a</sup> |                                                                                                                                                                     | km/mole                                                                                                 |                                                                                      |
| 3078 sh                                   |                                           |                                                                                                                                                                     |                                                                                                         | Ph: $\nu_{ar}CH$                                                                     |
| 3057 vw                                   | 3061 m                                    | 3079; 3079; 3079; 3079;<br>3072; 3072;<br>3069; 3069; 3069; 3069;<br>3066; 3066;<br>3060; 3060; 3060; 3060;<br>3060; 3060;<br>3051; 3051; 3051; 3051;<br>3050; 3050 | 5; 19; 10; 8;<br>0; 48;<br>0; 45; 68; 0;<br>32; 15;<br>0; 49; 34; 0;<br>10; 53;<br>4; 10; 5; 0;<br>5; 4 | Ph: $\nu_{ar}CH$                                                                     |
| 3026 vw                                   | 3024 sh vw                                | 3044; 3044; 3044; 3044;<br>3042; 3042                                                                                                                               | 0; 5; 7; 0;<br>0; 3                                                                                     | Ph: $\nu_{ar}CH$                                                                     |
| 2135 vvw                                  | 2140 w<br>2115 vw                         |                                                                                                                                                                     |                                                                                                         |                                                                                      |
| 2092 sh                                   | 2088 m                                    | 2073                                                                                                                                                                | 0                                                                                                       | $\nu_sCO$                                                                            |
| 2077 s                                    | 2076 w                                    | 2066                                                                                                                                                                | 1221                                                                                                    | $\nu_sCO$                                                                            |
| 2047 s, sh                                | 2023 w                                    | 2022; 2020; 2018;                                                                                                                                                   | 0; 1230; 1145;                                                                                          | $\nu_{as}CO$                                                                         |
| 2010 vs                                   | 2014 vw<br>2004 w                         | 2012; 2008; 2007                                                                                                                                                    | 0; 1074; 0                                                                                              | $\nu_{as}CO$                                                                         |
| 1985 vs, sh                               | 1990 w                                    |                                                                                                                                                                     |                                                                                                         |                                                                                      |
| 1954 sh;                                  | 1979 w                                    |                                                                                                                                                                     |                                                                                                         |                                                                                      |
| 1914 s, sh                                |                                           |                                                                                                                                                                     |                                                                                                         |                                                                                      |
| 1646 vvw                                  | 1634 sh                                   |                                                                                                                                                                     |                                                                                                         |                                                                                      |
| 1597 vw                                   | 1598 vs                                   | 1604; 1604;<br>1601; 1601; 1600; 1600                                                                                                                               | 0; 26;<br>0; 5; 8; 0                                                                                    | Ph: $\nu_{CC}$ , $\delta_{CCH}$                                                      |
| 1575 vvw                                  | 1577 vw                                   | 1580; 1580;                                                                                                                                                         | 4; 0;                                                                                                   | Ph: $\nu_{CC}$ , $\delta_{CCH}$                                                      |
| 1556 vvw                                  |                                           | 1576; 1576; 1575; 1575                                                                                                                                              | 0; 1; 9; 0                                                                                              |                                                                                      |
| 1538 vw                                   |                                           |                                                                                                                                                                     |                                                                                                         |                                                                                      |
| 1520 vvw                                  |                                           |                                                                                                                                                                     |                                                                                                         |                                                                                      |
| 1490 w                                    | 1492 w                                    | 1505; 1505; 1502; 1502;<br>1500; 1500                                                                                                                               | 0; 34; 0; 0;<br>35; 0                                                                                   | Ph: $\nu_{CC}$ , $\delta_{CCH}$ ,<br>$\nu_{C_{Ph}C_{lig}}$                           |
| 1444 w                                    | 1446 vw                                   | 1455; 1455; 1455; 1455;<br>1451; 1451                                                                                                                               | 3; 0; 0; 3;<br>14; 0                                                                                    | Ph: $\nu_{CC}$ , $\delta_{CCH}$                                                      |
| 1411 vw                                   | 1396 vw                                   | 1378; 1378                                                                                                                                                          | 0; 4                                                                                                    | $\nu_{C_{Ph}C_{lig}}$ , $\nu_sCC$<br>(ligand)                                        |
|                                           | 1368 m                                    | 1356; 1356                                                                                                                                                          | 46; 0                                                                                                   | $\nu_{C_{Ph}C_{lig}}$ , $\nu_{as}CC$<br>(ligand)                                     |
|                                           | 1334 vw                                   | 1328; 1328; 1327; 1327                                                                                                                                              | 3; 0; 0; 0                                                                                              | Ph: $\delta_{CCH}$ , $\nu_{CC}$                                                      |
|                                           | 1312 vw                                   | 1324; 1324                                                                                                                                                          | 2; 0                                                                                                    | Ph: $\delta_{CCH}$ , $\nu_{CC}$                                                      |
|                                           | 1293 w                                    | 1286; 1286; 1284; 1284;<br>1279; 1279                                                                                                                               | 0; 0; 2; 0;<br>11; 0                                                                                    | Ph: $\nu_{CC}$ ,<br>$\nu_{C_{Ph}C_{lig}}$                                            |
| 1260 m                                    | 1275 vw                                   | 1270; 1270                                                                                                                                                          | 0; 0                                                                                                    | Ph: $\nu_{CC}$ ,<br>$\nu_{C_{Ph}C_{lig}}$                                            |
| 1179 w                                    | 1183 w                                    | 1183;<br>1182; 1182; 1181; 1180;<br>1179; 1179; 1178                                                                                                                | 33;<br>0; 1; 0; 15;<br>0; 2; 0                                                                          | Ph: $\nu_{CC}$ , $\delta_{CCH}$ ,<br>$\nu_{C_{Ph}C_{lig}}$ ,<br>ligand: $\nu_{as}CC$ |
| 1154 w                                    | 1159 vw                                   | 1160; 1160; 1160; 1159;<br>1159; 1159                                                                                                                               | 0; 0; 0; 0;<br>0; 0                                                                                     | Ph: $\delta_{CCH}$ , $\nu_{CC}$                                                      |
|                                           | 1146 w                                    | 1148; 1148                                                                                                                                                          | 1; 2                                                                                                    | $\nu_{C_{Ph}C_{lig}}$                                                                |

|        |            |                        |                 |                                                   |
|--------|------------|------------------------|-----------------|---------------------------------------------------|
| 1095 m | 1109 vv    | 1089; 1089             | 16; 0           | Ph: vCC, $\delta$ CCC,<br>ligand: vCC, vPC        |
| 1078 m | 1076 vv    | 1083; 1083; 1083; 1083 | 3; 0; 0; 1      | Ph: vCC, $\delta$ CCH,                            |
| 1028 m | 1033 w     | 1038; 1038;            | 0; 0;           | Ph: vCC, $\delta$ CCH                             |
|        |            | 1033; 1033; 1032; 1032 | 20; 0; 0; 10    |                                                   |
|        | 1003 s     | 1006; 1006;            | 0; 7;           | Ph: $\delta$ CCC                                  |
|        | 990 sh     | 999; 999; 998; 998     | 0; 4; 0; 5      |                                                   |
|        | 971 vv     | 979; 979; 979; 979;    | 1; 0; 0; 1;     | Ph: out-of-plane                                  |
|        |            | 978; 978               | 0; 0            |                                                   |
|        | 962 vv     | 967; 966; 966; 965;    | 0; 1; 19; 0;    | Ligand: v <sub>s</sub> PC, v <sub>as</sub> PC     |
|        |            | 955; 955; 954; 954;    | 0; 0; 6; 0;     | Ph: $\delta$ CCC, vCC                             |
|        |            | 953; 953               | 0; 0            | Ph: out-of-plane                                  |
|        | 929 vv, br | 917; 917; 915; 915     | 2; 0; 0; 11     | Ph: out-of-plane                                  |
| 913 vv | 915 vv     | 910; 909               | 20; 0           | Ph: out-of-plane H,<br>Ligand: v <sub>as</sub> PC |
| 867 vv |            | 849; 849; 847; 847;    | 0; 0; 0; 0;     | vC <sub>Ph</sub> C <sub>lig</sub> ,               |
|        |            | 845; 845;              | 5; 0;           | Ph: out-of-plane, vCC                             |
|        | 841 w      | 843; 842               | 0; 1            | Ligand: v <sub>s</sub> PC                         |
| 797 m  | 791 vv     | 794; 793               | 51; 0           | Ph: out-of-plane,                                 |
|        |            |                        |                 | vC <sub>Ph</sub> C <sub>lig</sub>                 |
|        | 769 vv     | 772; 772               | 9; 0            | Ph: out-of-plane                                  |
| 757 w  | 757 sh vv  | 763; 762               | 0; 59           | Ph: out-of-plane                                  |
| 727 vv |            | 734; 733               | 65; 0           | Ph: out-of-plane,                                 |
|        |            |                        |                 | vC <sub>Ph</sub> C <sub>lig</sub>                 |
|        |            |                        |                 | Ligand: v <sub>as</sub> PC                        |
| 698 m  | 692 vv     | 706; 706; 700; 700;    | 21; 0; 0; 58;   | Ph: out-of-plane,                                 |
|        |            | 699; 699;              | 54; 0;          | Ligand: out-of-plane                              |
|        |            | 697; 697               | 2; 0            |                                                   |
|        |            | 682; 677               | 0; 370          | $\delta$ MnCO, $\delta$ MnC                       |
|        |            |                        |                 | v <sub>s</sub> MnC                                |
|        | 663 vv     | 670; 670               | 0; 0            | Ph: $\delta$ CCC                                  |
|        |            |                        |                 | Ligand: v <sub>s</sub> PC                         |
| 648 m  | 652 sh     | 657; 656; 652; 644;    | 0; 121; 407; 0; | $\delta$ MnC, $\delta$ MnCO,                      |
|        |            | 642; 642               | 0; 5            | vMnC                                              |
|        |            |                        |                 | Ph: $\delta$ CCC,                                 |
|        |            |                        |                 | Ligand: vPC, $\delta$ CCC                         |
| 627 s  | 622 vv     | 630; 630; 630; 630;    | 1; 0; 0; 2;     | Ph: $\delta$ CCC, $\delta$ CCH,                   |
|        |            | 626; 626               | 0; 0            | out-of-plane                                      |
| 575 vv | 573 vv     | 588; 586;              | 2; 0;           | Ph: $\delta$ CCC, Ligand                          |
|        |            |                        |                 | $\delta$ PCC                                      |
|        |            | 583; 582;              | 0; 0;           | $\delta$ MnC, $\delta$ MnCO                       |
|        |            | 580; 576;              | 0; 0;           | Out-of-plane lig                                  |
|        |            |                        |                 | v <sub>s</sub> PP, v <sub>as</sub> PP             |
|        |            | 569; 568               | 0; 11           | $\delta$ MnCO, $\delta$ MnC                       |
| 542 vv | 544 vv     | 547; 541               | 0, 19           | v <sub>s</sub> PP, v <sub>as</sub> PP             |
| 511 vv | 514 w      | 520; 519; 511; 510     | 5; 0; 3; 0      | Out-of-plane lig-Ph                               |
|        |            |                        |                 | v <sub>as</sub> PC,                               |
|        |            |                        |                 | Ph: tors CC                                       |
| 491 vv | 491 vv     | 495; 495;              | 0; 29;          | Out-of-plane lig-Ph                               |
|        |            |                        |                 | Ph: tors CC,                                      |
|        |            |                        |                 | vPC, vMnC                                         |
|        |            | 494; 489               | 0; 6            | vMnC, $\delta$ MnCO                               |

|         |         |                                 |                     |                                                                                 |
|---------|---------|---------------------------------|---------------------|---------------------------------------------------------------------------------|
|         |         | 482; 481                        | 18; 0               | vMnC                                                                            |
|         | 474 vw  | 470; 466                        | 37; 0               | vMnC, $\delta$ MnCO,<br>$\delta$ PMnC                                           |
|         | 449 vvw | 457; 455; 453; 446              | 0; 2; 1; 0          | vMnC, $\delta$ MnCO<br>vPC, $\delta_{\text{Ph-lig}}$ CCC,<br>$\delta$ CPP, vMnP |
| 423 vvw |         | 426; 425; 424; 424              | 5; 0; 0; 3          | vMnC, $\delta$ MnCO                                                             |
|         | 408 w   | 410; 410; 410; 409;<br>408; 408 | 0; 2; 0; 0;<br>0; 0 | Ph: tors CC                                                                     |
|         | 385 vw  | 400; 399                        | 0; 8                | $\nu_s$ MnC                                                                     |
|         | 357 vvw | 367; 364                        | 5; 0                | c                                                                               |
|         |         | 350                             | 0                   | c                                                                               |
|         |         | 344                             | 0                   | c                                                                               |
|         | 300 vw  | 313; 297                        | 16; 0               | c                                                                               |
|         | 261 w   | 267; 265; 257; 254              | 0; 0; 0; 30         | c                                                                               |
|         | 241 w   | 236; 236; 235; 231              | 0; 0; 0; 34         | c                                                                               |
|         | 220 w   | 210; 210                        | 0; 5                | c                                                                               |
|         | 176 w   | 185                             | 2                   | c                                                                               |
|         | 160 w   | 167; 165; 162                   | 0; 0; 0             | c                                                                               |

<sup>a</sup>w, weak; m, medium; s, strong; v, very; sh, shoulder; br, broad.

<sup>b</sup> $\nu$ , stretch;  $\delta$ , bend; s, symmetrical; as, antisymmetrical.

<sup>c</sup>complex vibration involving the whole molecule

**Table 3S:** Calculated and experimental vibrational spectra of **3a**.

| Experiment                                |                                           | Computations                                                                                |                                                         |                                                                                                                                                                                                                                                                          |
|-------------------------------------------|-------------------------------------------|---------------------------------------------------------------------------------------------|---------------------------------------------------------|--------------------------------------------------------------------------------------------------------------------------------------------------------------------------------------------------------------------------------------------------------------------------|
| IR, solid                                 | Raman, solid                              | $\nu$ (cm <sup>-1</sup> ) <sup>b</sup>                                                      | I <sub>IR</sub>                                         | Assignment <sup>c</sup>                                                                                                                                                                                                                                                  |
| $\nu$ (cm <sup>-1</sup> ), I <sup>a</sup> | $\nu$ (cm <sup>-1</sup> ), I <sup>a</sup> |                                                                                             | km/mole                                                 |                                                                                                                                                                                                                                                                          |
| 3057 m                                    | 3060 s                                    | 3058;                                                                                       | 2;                                                      | Ph: $\nu_{\text{ar}}\text{CH}$                                                                                                                                                                                                                                           |
| 3025 m                                    | 3025 w sh                                 | 3040; 3036; 3030; 3029;<br>3028; 3022; 3021; 3020;<br>3012; 3012; 3011; 3003;<br>3003; 3003 | 4; 7; 13; 27;<br>28; 32; 21; 22;<br>5; 9; 6; 2;<br>0; 1 | Ph: $\nu_{\text{ar}}\text{CH}$                                                                                                                                                                                                                                           |
| 2020 vs                                   | 2023 w                                    | 2007                                                                                        | 996                                                     | $\nu_{\text{s}}\text{CO}$                                                                                                                                                                                                                                                |
| 1951 vs br                                | 1956 w br                                 | 1968; 1949                                                                                  | 639; 650                                                | $\nu_{\text{as}}\text{CO}$                                                                                                                                                                                                                                               |
| 1598 w                                    | 1599 vs                                   | 1605; 1604; 1603                                                                            | 2; 2; 1                                                 | Ph: $\nu_{\text{CC}}, \delta_{\text{CCH}}$                                                                                                                                                                                                                               |
| 1577 vw sh                                | 1578 w                                    | 1582; 1580; 1579                                                                            | 3; 1; 4                                                 | Ph: $\nu_{\text{CC}}, \delta_{\text{CCH}}$                                                                                                                                                                                                                               |
| 1490 m                                    | 1494 w                                    | 1507; 1504; 1503                                                                            | 9; 4; 12                                                | Ph: $\nu_{\text{CC}}, \delta_{\text{CCH}},$<br>$\nu_{\text{C}_{\text{Ph}}\text{C}_{\text{lig}}}$                                                                                                                                                                         |
| 1443 m                                    | 1443 vw                                   | 1457; 1455; 1454                                                                            | 2; 1; 12                                                | Ph: $\nu_{\text{CC}}, \delta_{\text{CCH}}$                                                                                                                                                                                                                               |
| 1370vw                                    | 1373 w                                    | 1369                                                                                        | 11                                                      | $\nu_{\text{lig}}\text{CC}, \nu_{\text{C}_{\text{Ph}}\text{C}_{\text{lig}}}$                                                                                                                                                                                             |
|                                           | 1359 vw                                   | 1344; 1331; 1329                                                                            | 6; 4; 1                                                 | $\nu_{\text{lig}}\text{CC}, \nu_{\text{C}_{\text{Ph}}\text{C}_{\text{lig}}},$<br>Ph: $\nu_{\text{CC}}, \delta_{\text{CCH}}$                                                                                                                                              |
|                                           | 1338 vw                                   |                                                                                             |                                                         | Ph: $\nu_{\text{CC}}, \delta_{\text{CCH}}$                                                                                                                                                                                                                               |
|                                           | 1311 vw                                   | 1325                                                                                        | 2                                                       | $\nu_{\text{lig}}\text{CC}, \nu_{\text{C}_{\text{Ph}}\text{C}_{\text{lig}}},$<br>Ph: $\nu_{\text{CC}}, \delta_{\text{CCH}}$                                                                                                                                              |
|                                           | 1287 w                                    | 1288; 1284; 1282                                                                            | 1; 2; 2                                                 | Ph: $\nu_{\text{CC}}$                                                                                                                                                                                                                                                    |
| 1261 m                                    | 1272 w                                    | 1255                                                                                        | 1                                                       | $\nu_{\text{C}_{\text{Ph}}\text{C}_{\text{lig}}}$                                                                                                                                                                                                                        |
|                                           | 1203 w                                    |                                                                                             |                                                         |                                                                                                                                                                                                                                                                          |
|                                           | 1194 w                                    | 1186; 1185; 1184;                                                                           | 1; 3; 2                                                 | Ph: $\nu_{\text{CC}}, \delta_{\text{CCH}},$<br>$\nu_{\text{C}_{\text{Ph}}\text{C}_{\text{lig}}}, \nu_{\text{ligas}}\text{CC}$                                                                                                                                            |
| 1177 vw                                   | 1184 w                                    | 1172;                                                                                       | 3                                                       | Ph: $\delta_{\text{CCH}}, \nu_{\text{CC}}$                                                                                                                                                                                                                               |
|                                           | 1159 w                                    | 1161; 1161; 1161                                                                            | 0; 0; 0                                                 | $\nu_{\text{C}_{\text{Ph}}\text{C}_{\text{lig}}}, \nu_{\text{lig}}\text{CC},$ Ph:<br>$\nu_{\text{CC}}$                                                                                                                                                                   |
|                                           | 1142 vw                                   | 1132                                                                                        | 0                                                       |                                                                                                                                                                                                                                                                          |
|                                           | 1128 vw                                   |                                                                                             |                                                         |                                                                                                                                                                                                                                                                          |
| 1096 m                                    |                                           | 1092; 1088; 1085                                                                            | 10; 0; 1                                                | Ph: $\nu_{\text{CC}}, \delta_{\text{CCH}}$                                                                                                                                                                                                                               |
| 1079 m                                    |                                           |                                                                                             |                                                         |                                                                                                                                                                                                                                                                          |
| 1027 m                                    | 1033 w                                    | 1038; 1034; 1032                                                                            | 0; 5; 3                                                 | Ph: $\nu_{\text{CC}}, \delta_{\text{CCH}}$                                                                                                                                                                                                                               |
|                                           | 1003 s                                    | 1004; 1000; 999                                                                             | 2; 0; 3                                                 | Ph: $\nu_{\text{CC}}, \delta_{\text{CCC}}$                                                                                                                                                                                                                               |
|                                           | 990 vw                                    | 983; 982; 981                                                                               | 0; 0; 0                                                 | Ph: out-of-plane,<br>tors: CC                                                                                                                                                                                                                                            |
|                                           | 968 vvw                                   | 964; 957; 956; 956; 954                                                                     | 2; 0; 1; 0; 5                                           | Ph: $\nu_{\text{CC}}, \delta_{\text{CCC}},$<br>Ligand: $\nu_{\text{PC}}, \delta_{\text{CCC}}$                                                                                                                                                                            |
| 913 vw                                    | 935 vvw                                   | 923; 921; 913                                                                               | 1; 1; 0                                                 | Ph: out-of-plane,<br>tors: CC                                                                                                                                                                                                                                            |
|                                           | 909 vvw                                   |                                                                                             |                                                         |                                                                                                                                                                                                                                                                          |
| 867 vw                                    | 869 vvw                                   | 847; 846; 845; 835                                                                          | 0; 0; 1; 1                                              | Ligand: $\nu_{\text{PC}},$<br>Ph: $\delta_{\text{CCC}}$                                                                                                                                                                                                                  |
|                                           | 842 vw                                    |                                                                                             |                                                         |                                                                                                                                                                                                                                                                          |
| 802 m                                     | 787 vvw                                   | 794                                                                                         | 10                                                      | Ph: out-of-plane,<br>$\nu_{\text{C}_{\text{Ph}}\text{C}_{\text{lig}}}$                                                                                                                                                                                                   |
| 756 w                                     | 766 vvw                                   | 770; 764                                                                                    | 5; 24                                                   | Ph: out-of-plane                                                                                                                                                                                                                                                         |
|                                           | 754 vvw                                   |                                                                                             |                                                         |                                                                                                                                                                                                                                                                          |
|                                           | 729 vvw                                   | 735                                                                                         | 29                                                      | Ph: out-of-plane                                                                                                                                                                                                                                                         |
| 698 s                                     | 710 vvw                                   | 702; 700; 700                                                                               | 24; 15; 32                                              | Ph: out-of-plane, tors                                                                                                                                                                                                                                                   |
| 652 m                                     | 659 vw                                    | 682; 666; 661; 649                                                                          | 114; 12; 0; 40                                          | $\delta_{\text{MnCO}}, \nu_{\text{MnC}};$<br>$\delta_{\text{PC}_{\text{lig}}\text{C}_{\text{Ph}}},$<br>$\delta_{\text{MnC}_{\text{lig}}\text{C}_{\text{Ph}}},$<br>$\delta_{\text{C}_{\text{lig}}\text{C}_{\text{Ph}}\text{C}_{\text{Ph}}},$<br>Ph: $\delta_{\text{CCC}}$ |

|        |                         |                                |                    |                                                                                                                                                                                                                    |
|--------|-------------------------|--------------------------------|--------------------|--------------------------------------------------------------------------------------------------------------------------------------------------------------------------------------------------------------------|
|        | 635 vvw                 | 639; 636; 631; 629             | 48; 11; 5; 1       | $\delta\text{MnCO}$ , $\nu\text{MnC}$ ,<br>Ph: $\delta\text{CCC}$                                                                                                                                                  |
| 618 m  | 621 vw                  | 623; 592; 572                  | 2; 11; 10          | $\delta\text{MnC}_{\text{lig}}\text{C}_{\text{Ph}}$ , $\nu\text{MnC}$ ,<br>Ph: $\delta\text{CCC}$                                                                                                                  |
|        | 560 vvw                 | 553                            | 10                 | $\nu\text{MnC}$ , Ph: out-of-<br>plane                                                                                                                                                                             |
| 527 w  |                         | 538; 532                       | 25; 26             | Ph: out-of-plane,<br>tors,<br>$\nu\text{PP}$ , $\nu\text{MnC}$                                                                                                                                                     |
|        | 513 w                   | 512;<br>506                    | 0;<br>7            | Ph: out-of-plane,<br>tors,<br>$\nu\text{PP}$ , $\nu\text{MnC}$                                                                                                                                                     |
| 494 vw | 491 w                   | 498; 493                       | 1; 4               | $\nu\text{MnC}$ , $\nu\text{PP}$ , $\nu\text{PC}$ , Ph:<br>out-of-plane                                                                                                                                            |
| 462 vw | 478 vw sh<br>457 vvw sh | 477; 476; 463                  | 2; 2; 4            | $\nu\text{MnC}$ , $\delta\text{MnCO}$ ,<br>$\delta\text{MnC}_{\text{lig}}\text{C}_{\text{Ph}}$                                                                                                                     |
|        | 408 vvw<br>343 vw       | 418; 411; 409; 405<br>366; 335 | 0; 0; 0; 0<br>1; 2 | $\delta\text{MnCO}$ , Ph: tors<br>$\delta\text{C}_{\text{lig}}\text{C}_{\text{lig}}\text{C}_{\text{Ph}}$ ,<br>$\delta\text{MnC}_{\text{lig}}\text{C}_{\text{Ph}}$ , $\nu\text{C}_{\text{lig}}\text{C}_{\text{Ph}}$ |
|        | 260 w                   | 281; 262; 255                  | 1; 0; 0            | $\delta\text{PC}_{\text{lig}}\text{C}_{\text{Ph}}$ ,<br>$\delta\text{C}_{\text{lig}}\text{C}_{\text{Ph}}\text{C}_{\text{Ph}}$ , $\nu\text{C}_{\text{lig}}\text{C}_{\text{Ph}}$ ,<br>Ligand: $\delta\text{PCC}$     |
|        | 238 w                   | 239; 231                       | 0; 0               | $\nu\text{MnP}$ , Ph: out-of-<br>plane                                                                                                                                                                             |
|        | 220 w<br>201 w          | 225; 214<br>192                | 0; 0<br>1          | $\nu\text{MnP}$ , $\nu\text{C}_{\text{lig}}\text{C}_{\text{Ph}}$<br>$\nu\text{MnC}$                                                                                                                                |

<sup>a,b,c</sup>See footnotes for Table 2S.

**Table 4S.** Selected bond lengths and angles in **2a**.

| <b>Bond lengths (Å)</b> |                     |                     |            |                     |                     |
|-------------------------|---------------------|---------------------|------------|---------------------|---------------------|
| P2-C1                   | 1.741 <sup>a</sup>  | 1.764 <sup>b</sup>  | P2-C3      | 1.733 <sup>a</sup>  | 1.764 <sup>b</sup>  |
| C2-C3                   | 1.408 <sup>a</sup>  | 1.418 <sup>b</sup>  | C1-C2      | 1.420 <sup>a</sup>  | 1.418 <sup>b</sup>  |
| Mn1-P2                  | 2.367 <sup>a</sup>  | 2.462 <sup>b</sup>  | Mn1-P1'    | 2.349 <sup>a</sup>  | 2.462 <sup>b</sup>  |
| P1-P2                   | 2.095 <sup>a</sup>  | 2.136 <sup>b</sup>  |            |                     |                     |
| <b>Angles (°)</b>       |                     |                     |            |                     |                     |
| C1-C2-C3                | 117.49 <sup>a</sup> | 118.07 <sup>b</sup> | C2-C3-P1   | 115.70 <sup>a</sup> | 115.82 <sup>b</sup> |
| C2-C1-P2                | 115.49 <sup>a</sup> | 115.82 <sup>b</sup> | C3-P1-P2   | 95.46 <sup>a</sup>  | 94.50 <sup>b</sup>  |
| C1-P2-P1                | 94.69 <sup>a</sup>  | 94.53 <sup>b</sup>  | C3-P1-Mn2  | 125.17 <sup>a</sup> | 125.89 <sup>b</sup> |
| C1-P2-Mn1               | 125.50 <sup>a</sup> | 125.90 <sup>b</sup> | P2-P1-Mn2  | 122.13 <sup>a</sup> | 119.54 <sup>b</sup> |
| P1-P2-Mn1               | 124.68 <sup>a</sup> | 119.72 <sup>b</sup> | P2-Mn1-P1' | 84.28 <sup>a</sup>  | 84.88 <sup>b</sup>  |

<sup>a</sup>X-ray<sup>b</sup> B3LYP/basis set II**Table 5S.** Selected bond lengths (Å) and angles (°) computed for **3a**.

| <b>Bond lengths (Å)</b> |        |           |        |
|-------------------------|--------|-----------|--------|
| P2-C1                   | 1.784  | P1-C3     | 1.803  |
| C1-C2                   | 1.441  | C2-C3     | 1.427  |
| Mn1-P2                  | 2.491  | Mn1-P1    | 2.501  |
| P1-P2                   | 2.167  |           |        |
| <b>Angles (°)</b>       |        |           |        |
| C1-C2-C3                | 115.54 | C2-C3-P1  | 118.25 |
| C2-C1-P2                | 117.79 | C1-P2-P1  | 94.67  |
| C3-P1-P2                | 93.61  | C1-P2-Mn1 | 60.63  |
| C3-P1-Mn1               | 61.83  | P1-P2-Mn1 | 64.50  |
| P2-P1-Mn1               | 64.05  | P2-Mn1-P1 | 51.45  |

**Table 6S.** Mulliken charges computed for complexes **2** and **3**.

|       | <b>2a</b> | <b>2b</b> | <b>2c</b> | <b>3a</b>       | <b>3b</b>       | <b>3c</b>       |
|-------|-----------|-----------|-----------|-----------------|-----------------|-----------------|
| Mn    | -0.552    | -0.545    | -0.540    | -0.407          | -0.403          | -0.398          |
| P     | 0.211     | 0.209     | 0.211     | 0.184,<br>0.218 | 0.186,<br>0.221 | 0.190,<br>0.225 |
| P2-Cp | 0.034     | 0.031     | 0.037     | -0.018          | -0.016          | -0.008          |



HOMO

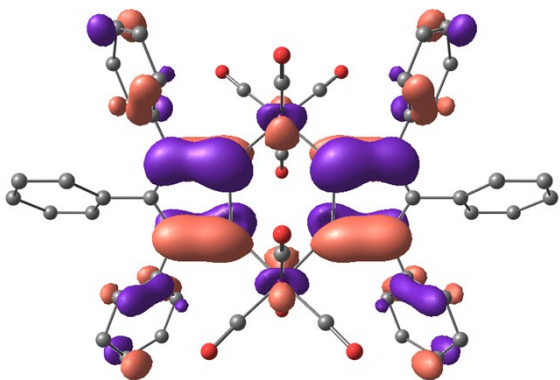

LUMO

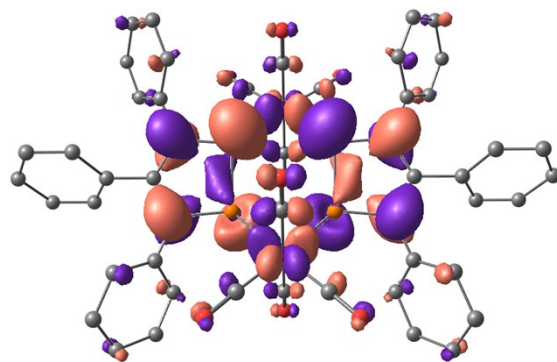

2a

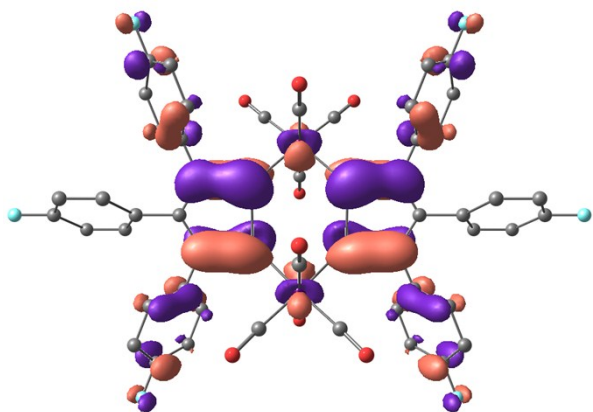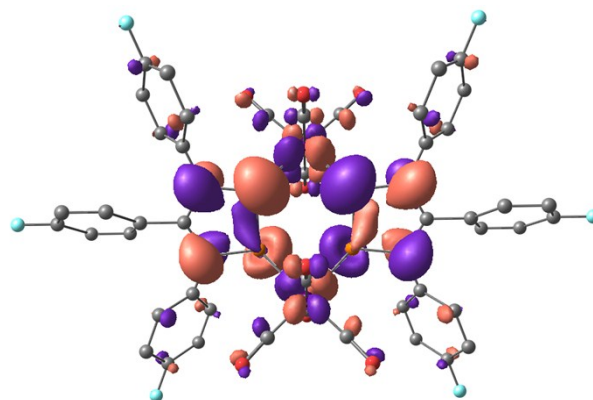

2b

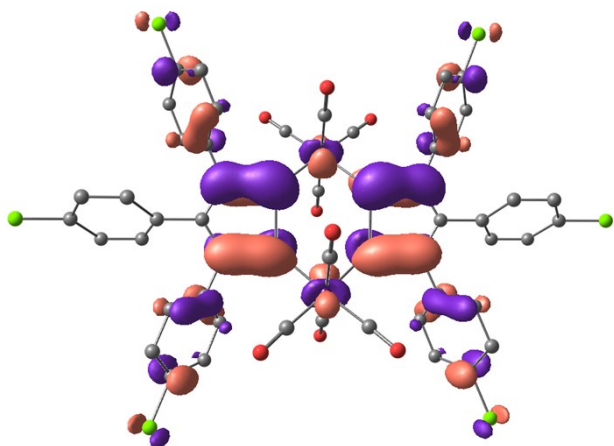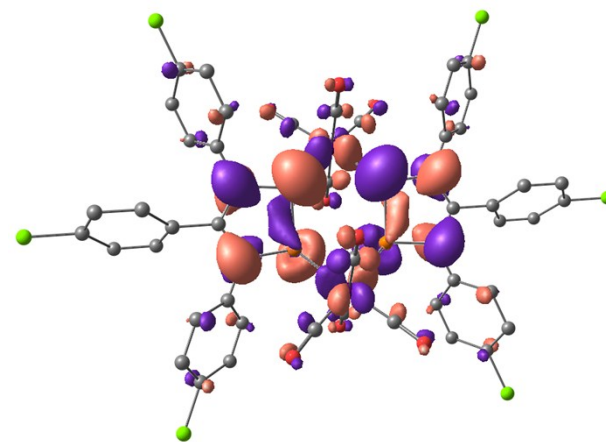

2c

**Figure 3S.** Frontier molecular orbitals of complexes **2**.

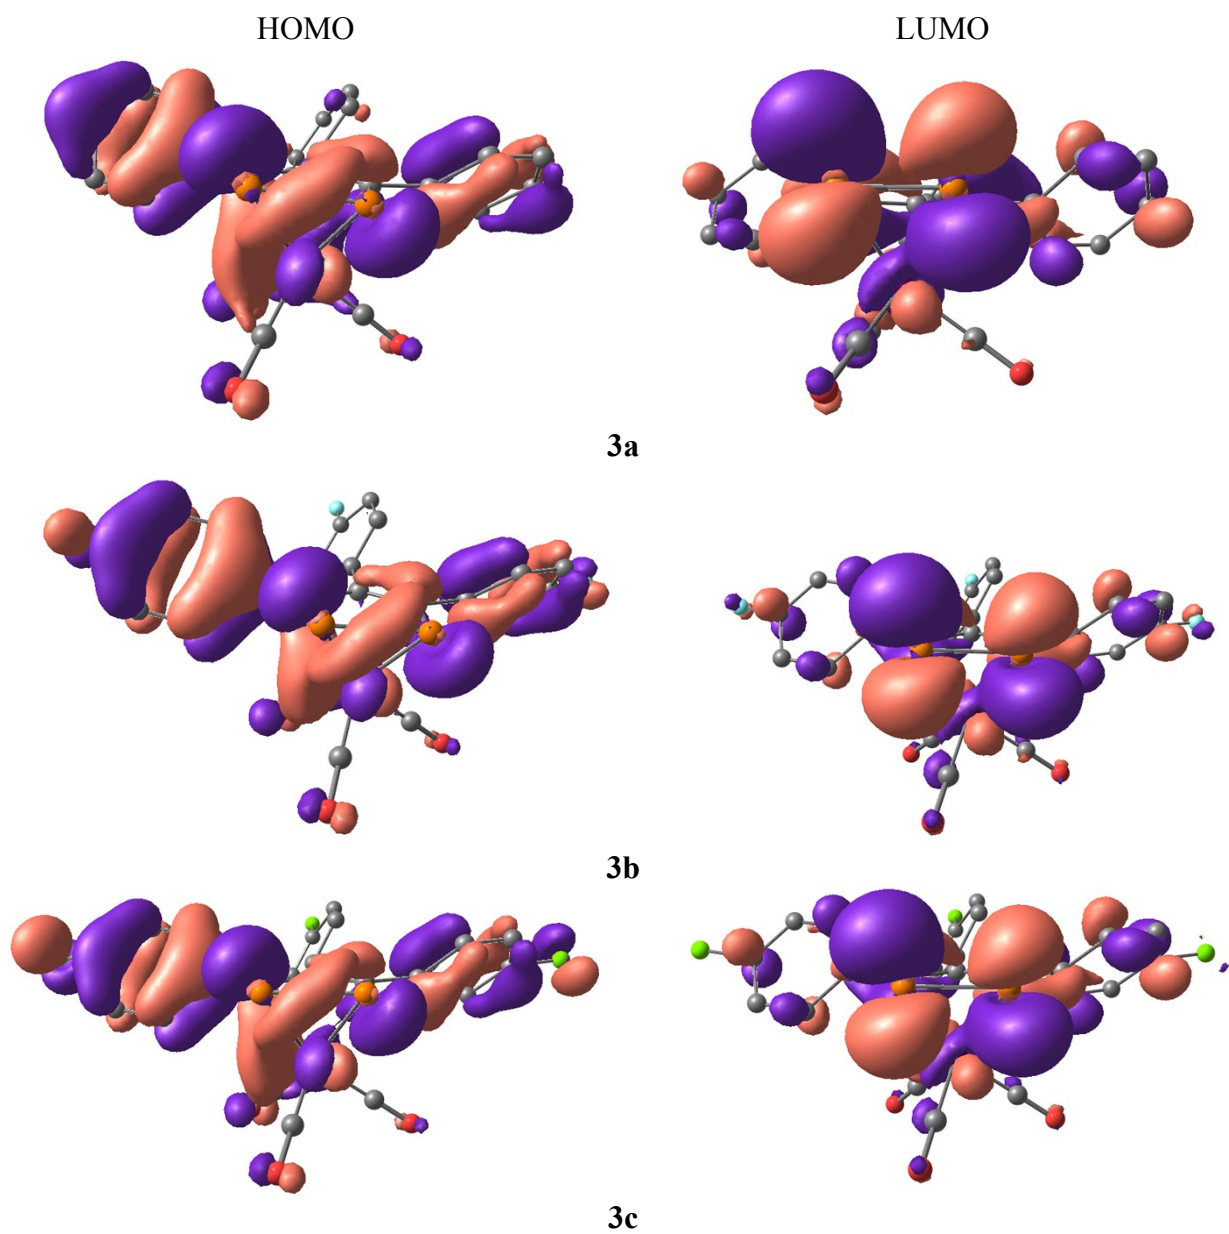

**Figure 4S.** Frontier molecular orbitals of complexes **3**.

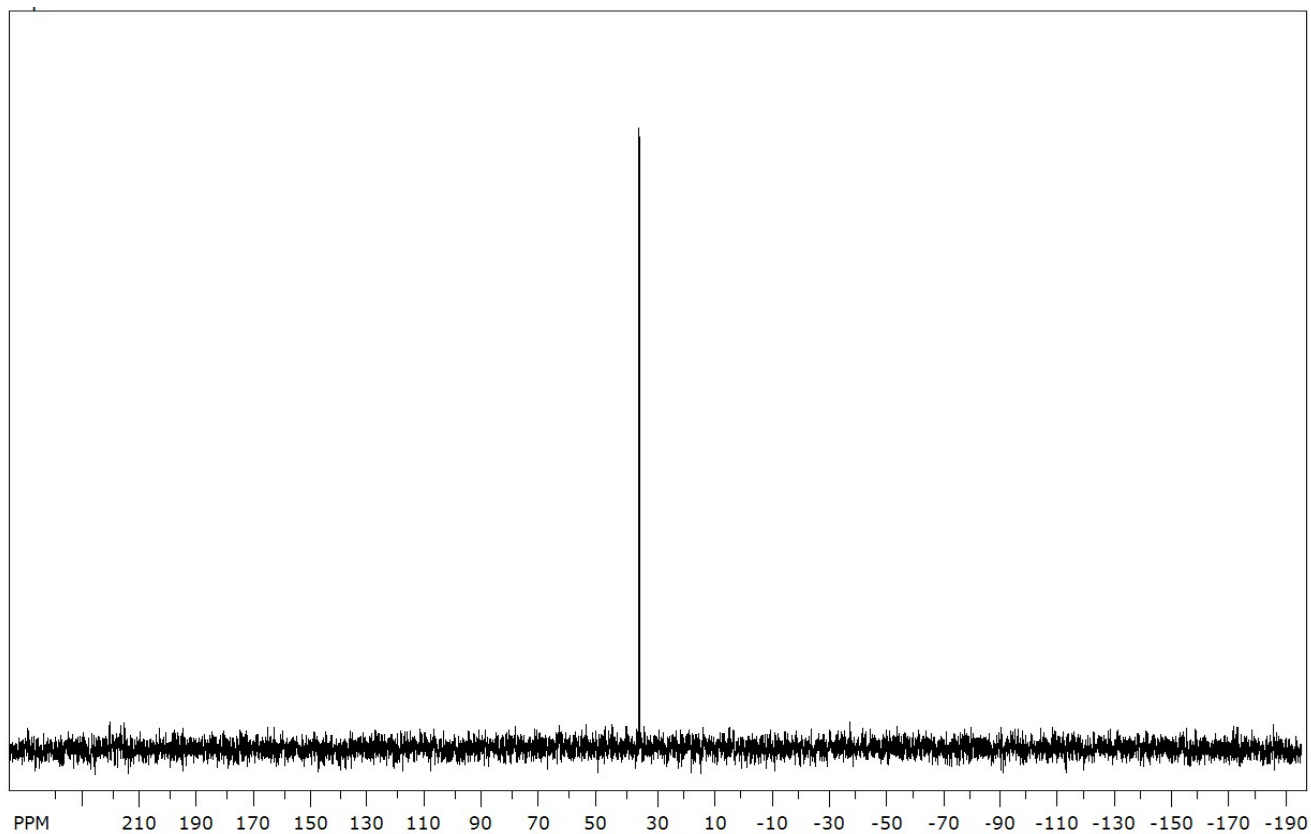

**Figure 5S.**  $^{31}\text{P}$  NMR spectrum of complex **3a**.

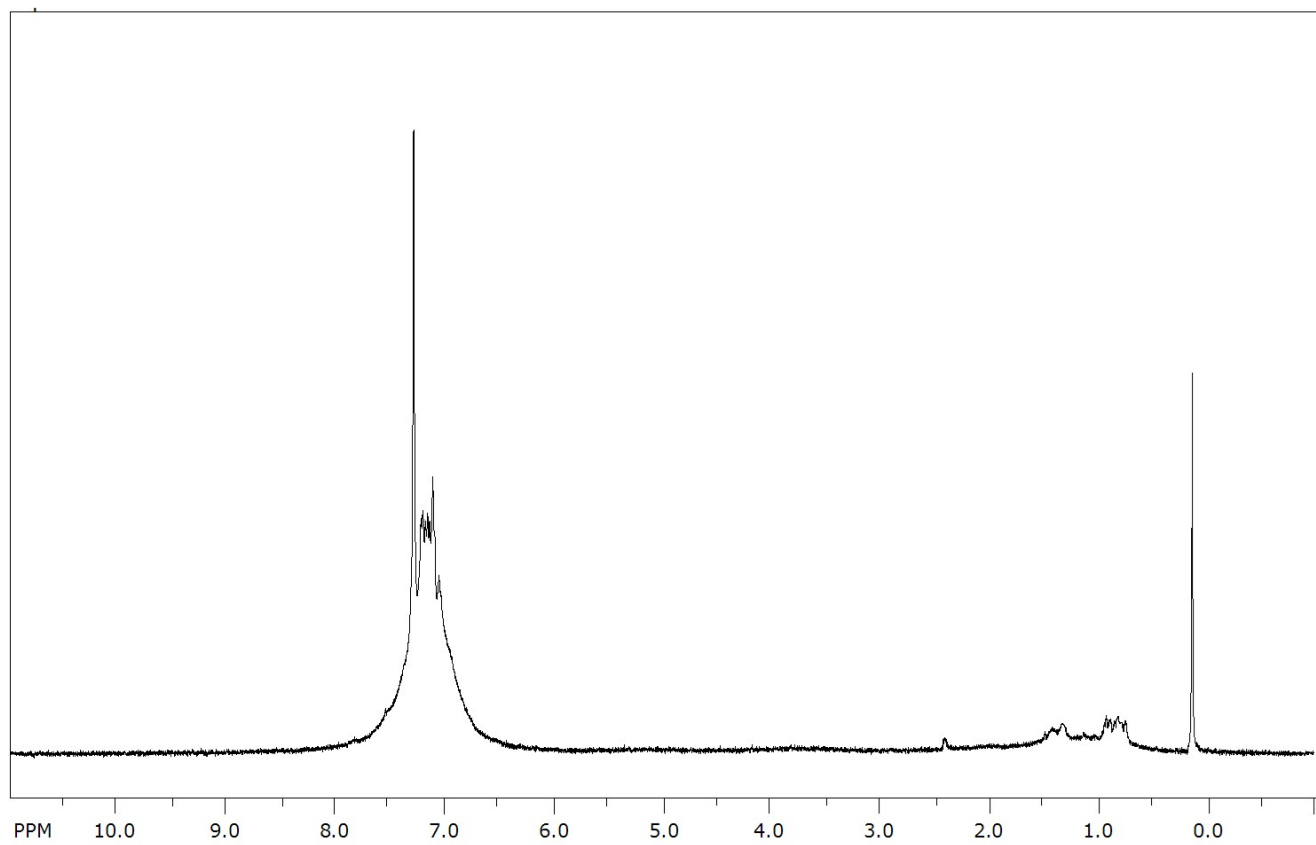

**Figure 6S.**  $^1\text{H}$  NMR spectrum of complex **3a**.

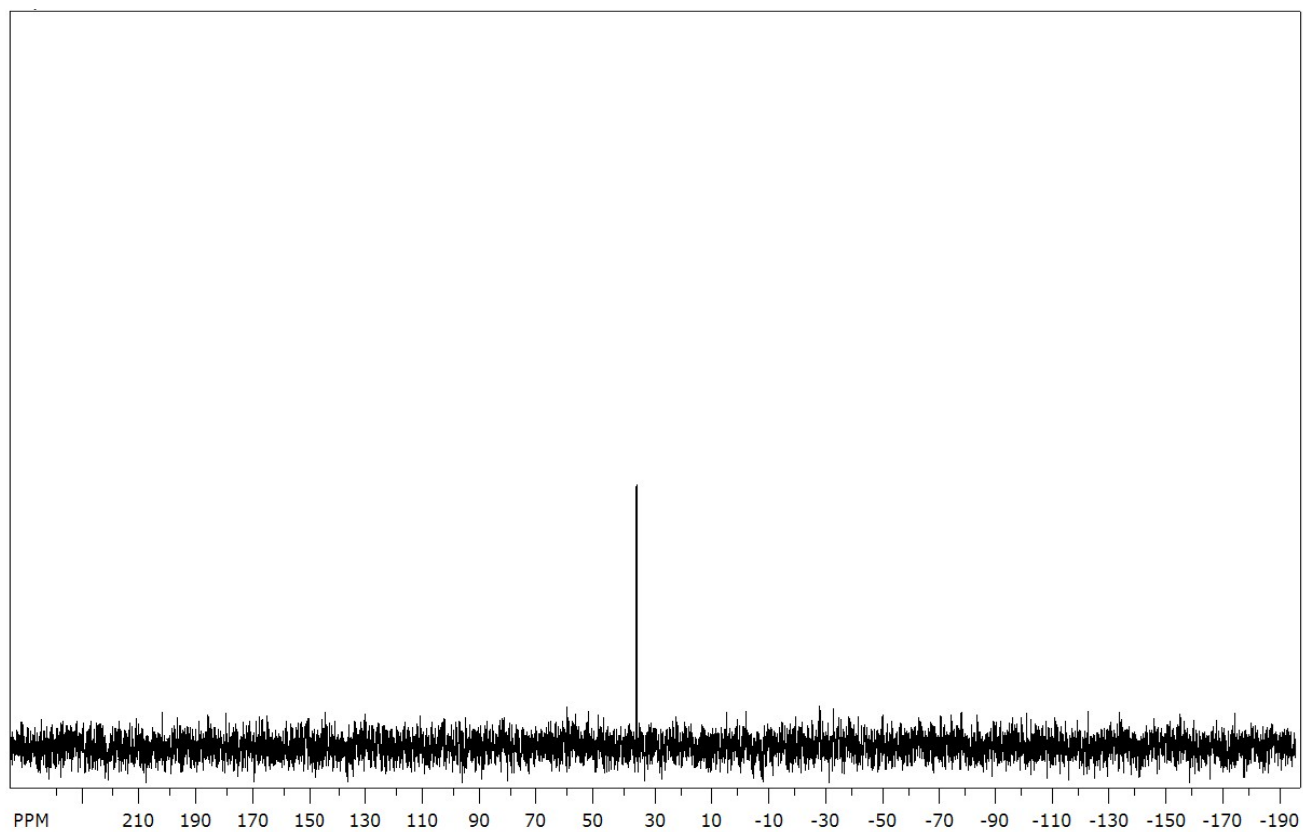

**Figure 7S.**  $^{31}\text{P}$  NMR spectrum of complex **3b**.

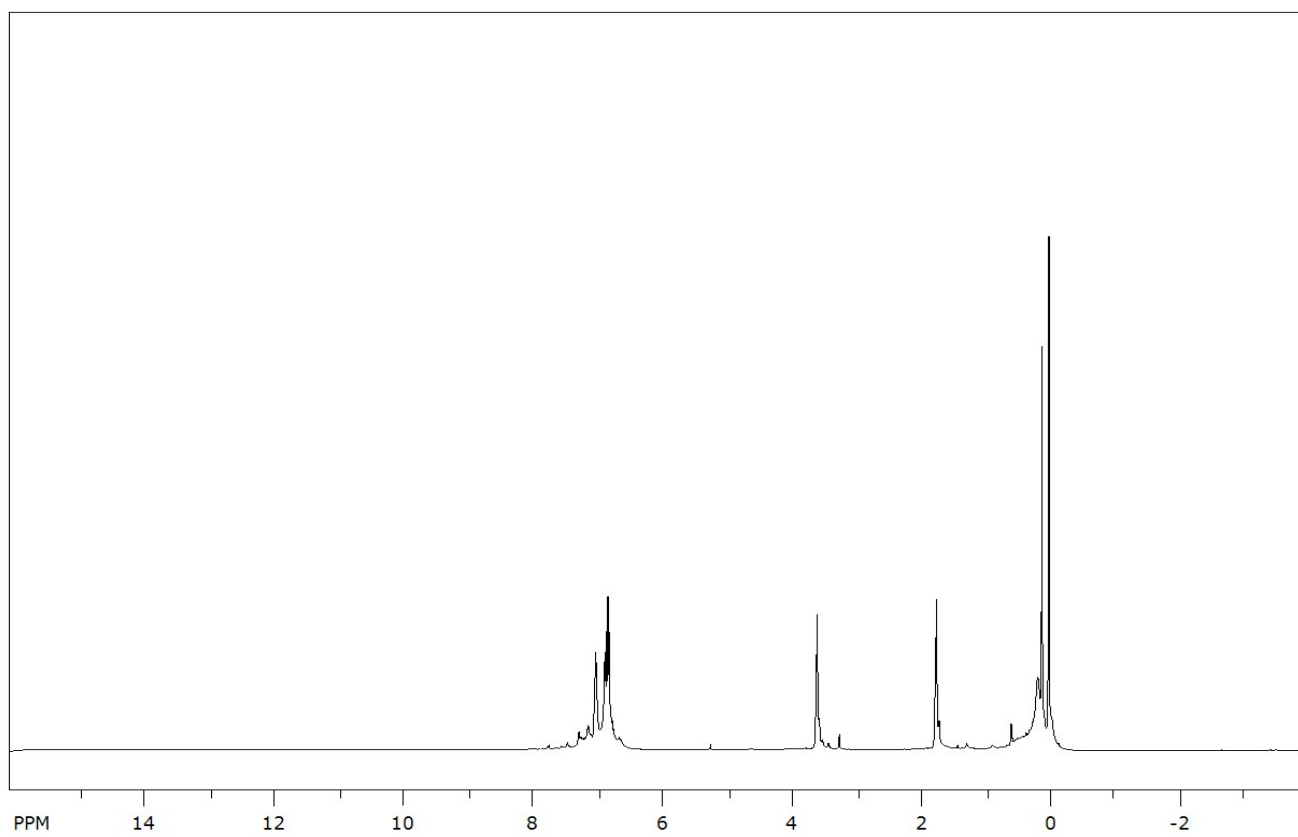

**Figure 8S.**  $^1\text{H}$  NMR spectrum of complex **3b**.

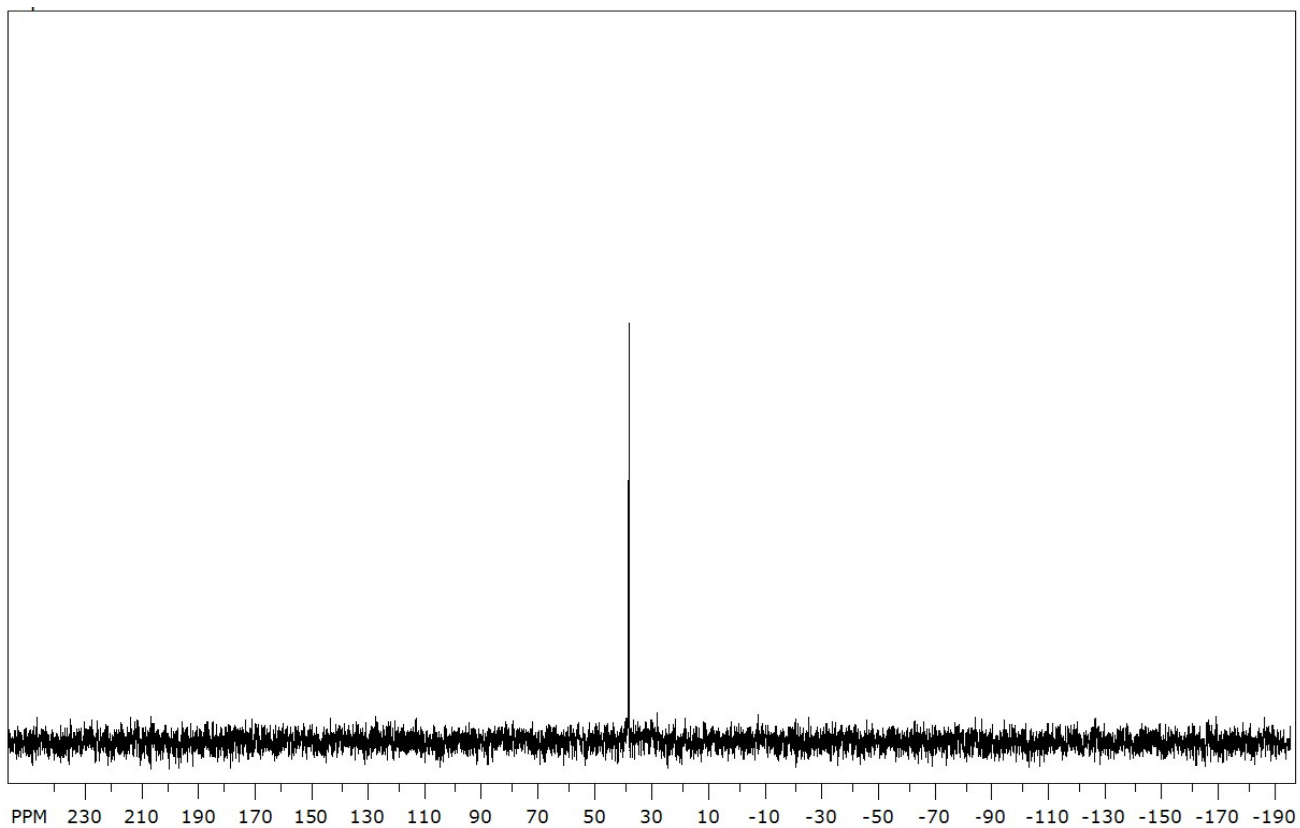

**Figure 9S.**  $^{31}\text{P}$  NMR spectrum of complex **3c**.

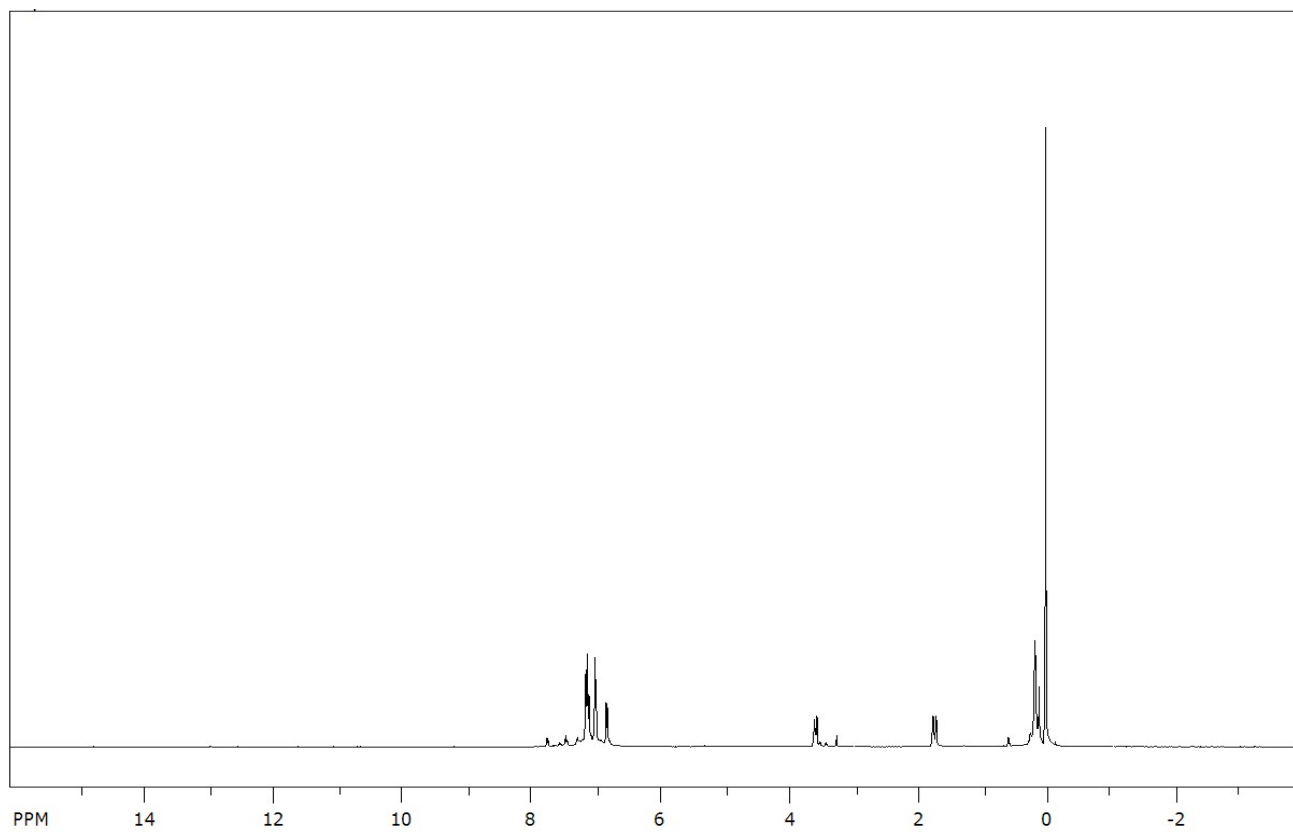

**Figure 10S.**  $^1\text{H}$  NMR spectrum of complex **3c**.
